# Supplementary material
Source: publisher figshare collection journal article supplement (https://frontiersin.figshare.com/ndownloader/files/25052507)
Supplement: Supplementary file 1 [file 25052507]

**Supplementary Table 1**:

| **dd/mm/yyyy hh:mm:ss** | **Lat.°N** | **Long.°E** | **Depth (km)** | | **ML** | **RMS** | **H-error** | **V-error** |
| --- | --- | --- | --- | --- | --- | --- | --- | --- |
| 24/12/2018 08:32:55 | 37.743 | 15.015 | 0.68 | 1.4 | | 0.11 | 0.1 | 0.6 |
| 24/12/2018 08:33:10 | 37.740 | 15.010 | 3.40 | 1.4 | | 0.15 | 0.3 | 0.5 |
| 24/12/2018 08:35:14 | 37.745 | 15.007 | 2.05 | 1.4 | | 0.05 | 0.3 | 0.4 |
| 24/12/2018 08:35:50 | 37.743 | 15.006 | 1.79 | 1.3 | | 0.11 | 0.2 | 0.6 |
| 24/12/2018 08:36:55 | 37.744 | 15.006 | 1.83 | 1.4 | | 0.16 | 0.3 | 0.8 |
| 24/12/2018 08:37:14 | 37.774 | 15.001 | 2.34 | 1.6 | | 0.11 | 0.2 | 0.3 |
| 24/12/2018 08:50:38 | 37.741 | 15.010 | 0.84 | 2.1 | | 0.06 | 0.4 | 0.2 |
| 24/12/2018 08:58:21 | 37.741 | 15.005 | 1.53 | 2.2 | | 0.16 | 0.2 | 0.3 |
| 24/12/2018 08:59:44 | 37.758 | 15.006 | 0.73 | 2.4 | | 0.23 | 0.2 | 0.2 |
| 24/12/2018 09:00:18 | 37.754 | 15.013 | 1.04 | 2.2 | | 0.18 | 0.3 | 0.3 |
| 24/12/2018 09:00:41 | 37.738 | 15.013 | 1.27 | 1.9 | | 0.13 | 0.3 | 0.3 |
| 24/12/2018 09:07:44 | 37.744 | 15.016 | 0.46 | 2.5 | | 0.17 | 0.2 | 0.3 |
| 24/12/2018 09:08:38 | 37.743 | 15.004 | 1.40 | 1.6 | | 0.07 | 0.4 | 0.5 |
| 24/12/2018 09:11:57 | 37.745 | 15.007 | 0.42 | 2.6 | | 0.17 | 0.1 | 0.2 |
| 24/12/2018 09:13:26 | 37.727 | 14.993 | 0.80 | 1.5 | | 0.26 | 0.2 | 0.3 |
| 24/12/2018 09:13:35 | 37.744 | 14.984 | 0.76 | 1.6 | | 0.24 | 0.3 | 0.6 |
| 24/12/2018 09:13:57 | 37.739 | 15.010 | 2.45 | 2.2 | | 0.11 | 0.7 | 0.6 |
| 24/12/2018 09:15:26 | 37.743 | 15.007 | 1.45 | 1.9 | | 0.08 | 0.2 | 0.3 |
| 24/12/2018 09:15:50 | 37.728 | 15.046 | 1.12 | 1.4 | | 0.18 | 0.4 | 1.8 |
| 24/12/2018 09:23:14 | 37.745 | 15.007 | 0.50 | 2.2 | | 0.12 | 0.1 | 0.4 |
| 24/12/2018 09:24:23 | 37.743 | 15.002 | 0.88 | 2.0 | | 0.14 | 0.2 | 0.6 |
| 24/12/2018 09:24:33 | 37.749 | 15.004 | 1.41 | 2.1 | | 0.12 | 0.2 | 0.3 |
| 24/12/2018 09:24:56 | 37.746 | 15.005 | 1.10 | 2.2 | | 0.11 | 0.1 | 0.3 |
| 24/12/2018 09:29:19 | 37.746 | 15.011 | 0.35 | 2.5 | | 0.15 | 0.1 | 0.2 |
| 24/12/2018 09:38:53 | 37.747 | 15.008 | 1.17 | 1.6 | | 0.08 | 0.1 | 0.3 |
| 24/12/2018 09:41:10 | 37.744 | 15.013 | 0.49 | 1.9 | | 0.15 | 0.1 | 0.3 |
| 24/12/2018 09:45:21 | 37.743 | 15.009 | 0.01 | 2.0 | | 0.18 | 0.1 | 0.2 |
| 24/12/2018 09:46:06 | 37.752 | 15.004 | 0.52 | 2.0 | | 0.07 | 0.1 | 0.8 |
| 24/12/2018 09:55:29 | 37.752 | 14.995 | 0.62 | 2.2 | | 0.10 | 0.2 | 0.2 |
| 24/12/2018 09:56:38 | 37.743 | 15.007 | 1.85 | 1.9 | | 0.17 | 0.2 | 0.4 |
| 24/12/2018 09:58:38 | 37.701 | 14.962 | -0.57 | 1.7 | | 0.14 | 0.1 | 0.1 |
| 24/12/2018 09:59:32 | 37.749 | 14.995 | 0.81 | 3.0 | | 0.18 | 0.3 | 0.4 |
| 24/12/2018 10:03:50 | 37.743 | 15.061 | 0.39 | 1.8 | | 0.19 | 0.1 | 0.3 |
| 24/12/2018 10:08:57 | 37.756 | 14.998 | 0.48 | 2.8 | | 0.28 | 0.2 | 0.7 |
| 24/12/2018 10:20:35 | 37.724 | 14.930 | -1.57 | 2.1 | | 0.11 | 0.4 | 0.6 |
| 24/12/2018 10:22:45 | 37.737 | 14.926 | -0.55 | 1.8 | | 0.25 | 0.3 | 0.4 |
| 24/12/2018 10:24:52 | 37.744 | 14.957 | -0.89 | 2.4 | | 0.18 | 0.2 | 0.3 |
| 24/12/2018 10:27:01 | 37.820 | 15.111 | 0.31 | 3.5 | | 0.18 | 0.2 | 0.5 |
| 24/12/2018 10:30:24 | 37.749 | 15.041 | -1.20 | 2.1 | | 0.26 | 0.2 | 0.7 |
| 24/12/2018 10:31:48 | 37.730 | 15.019 | 0.68 | 2.0 | | 0.21 | 0.2 | 0.3 |
| 24/12/2018 10:33:59 | 37.745 | 15.007 | -1.50 | 2.5 | | 0.17 | 0.3 | 0.4 |
| 24/12/2018 10:38:20 | 37.695 | 14.963 | -0.65 | 2.2 | | 0.21 | 0.2 | 0.3 |
| 24/12/2018 10:39:11 | 37.742 | 15.006 | -0.46 | 3.2 | | 0.11 | 0.1 | 0.2 |
| 24/12/2018 10:41:22 | 37.773 | 15.001 | 1.07 | 2.2 | | 0.26 | 0.2 | 0.3 |
| 24/12/2018 10:42:23 | 37.759 | 15.007 | 0.85 | 2.6 | | 0.14 | 0.2 | 0.2 |
| 24/12/2018 10:42:53 | 37.725 | 15.032 | 1.57 | 2.1 | | 0.13 | 0.3 | 0.4 |
| 24/12/2018 10:43:52 | 37.716 | 15.031 | 3.31 | 2.0 | | 0.06 | 0.4 | 0.7 |
| 24/12/2018 10:44:20 | 37.722 | 14.946 | 1.11 | 3.0 | | 0.17 | 0.1 | 0.3 |
| 24/12/2018 10:44:59 | 37.814 | 15.088 | 1.12 | 3.2 | | 0.14 | 0.2 | 0.3 |
| 24/12/2018 10:53:45 | 37.756 | 15.003 | 0.66 | 2.1 | | 0.12 | 0.3 | 0.3 |
| 24/12/2018 10:53:52 | 37.757 | 14.989 | 1.41 | 2.6 | | 0.06 | 0.2 | 0.2 |
| 24/12/2018 10:54:43 | 37.715 | 15.029 | 1.86 | 2.0 | | 0.16 | 0.3 | 0.3 |
| 24/12/2018 11:01:50 | 37.743 | 14.969 | 0.94 | 4.0 | | 0.22 | 0.1 | 0.1 |
| 24/12/2018 11:03:58 | 37.724 | 15.025 | 0.72 | 2.5 | | 0.18 | 0.2 | 0.3 |
| 24/12/2018 11:06:15 | 37.716 | 15.027 | 2.09 | 2.5 | | 0.19 | 0.2 | 0.2 |
| 24/12/2018 11:09:12 | 37.720 | 15.021 | 1.26 | 2.2 | | 0.24 | 0.2 | 0.3 |
| 24/12/2018 11:09:40 | 37.718 | 15.016 | 3.55 | 2.5 | | 0.13 | 0.3 | 0.5 |
| 24/12/2018 11:12:04 | 37.712 | 15.038 | 2.02 | 3.0 | | 0.31 | 0.2 | 0.5 |
| 24/12/2018 11:26:20 | 37.721 | 15.022 | 2.09 | 2.9 | | 0.20 | 0.1 | 0.3 |
| 24/12/2018 12:04:49 | 37.725 | 14.959 | 1.20 | 3.3 | | 0.16 | 0.1 | 0.2 |
| 24/12/2018 12:08:56 | 37.713 | 15.046 | 0.56 | 4.0 | | 0.18 | 0.1 | 0.3 |
| 24/12/2018 12:19:28 | 37.715 | 15.045 | 0.52 | 3.4 | | 0.16 | 0.1 | 0.4 |
| 24/12/2018 12:31:52 | 37.714 | 15.047 | 0.76 | 3.0 | | 0.12 | 0.2 | 0.5 |
| 24/12/2018 13:02:43 | 37.718 | 15.019 | 0.21 | 2.3 | | 0.22 | 0.3 | 0.3 |
| 24/12/2018 13:03:18 | 37.710 | 15.042 | 0.83 | 2.4 | | 0.15 | 0.2 | 0.3 |
| 24/12/2018 13:14:55 | 37.731 | 15.039 | 1.88 | 2.1 | | 0.22 | 0.1 | 0.1 |
| 24/12/2018 13:39:09 | 37.724 | 15.020 | 1.63 | 2.1 | | 0.21 | 0.2 | 0.2 |
| 24/12/2018 13:41:31 | 37.713 | 15.022 | 1.64 | 2.1 | | 0.13 | 0.3 | 0.4 |
| 24/12/2018 13:49:51 | 37.709 | 15.045 | 0.86 | 3.3 | | 0.16 | 0.1 | 0.2 |
| 24/12/2018 13:54:34 | 37.716 | 15.049 | 1.41 | 2.0 | | 0.17 | 0.2 | 0.3 |
| 24/12/2018 13:54:47 | 37.718 | 15.045 | -0.98 | 2.0 | | 0.25 | 0.2 | 0.7 |
| 24/12/2018 13:56:12 | 37.716 | 15.046 | -1.36 | 2.2 | | 0.17 | 0.2 | 0.6 |
| 24/12/2018 14:17:12 | 37.705 | 15.019 | 1.06 | 2.0 | | 0.21 | 0.2 | 0.2 |
| 24/12/2018 14:18:35 | 37.716 | 15.022 | 2.90 | 1.9 | | 0.11 | 0.3 | 0.4 |
| 24/12/2018 14:27:29 | 37.711 | 15.022 | 2.32 | 2.1 | | 0.20 | 0.1 | 0.1 |
| 24/12/2018 14:30:03 | 37.717 | 15.041 | 2.42 | 1.9 | | 0.21 | 0.2 | 0.4 |
| 24/12/2018 14:35:49 | 37.724 | 15.020 | 1.02 | 1.9 | | 0.25 | 0.2 | 0.5 |
| 24/12/2018 14:57:51 | 37.711 | 15.021 | 2.86 | 1.8 | | 0.19 | 0.5 | 0.6 |
| 24/12/2018 14:58:13 | 37.733 | 15.020 | 1.47 | 1.7 | | 0.32 | 0.2 | 0.5 |
| 24/12/2018 15:02:59 | 37.714 | 15.029 | 2.16 | 2.1 | | 0.19 | 0.2 | 0.1 |
| 24/12/2018 15:10:05 | 37.748 | 15.121 | 3.98 | 2.1 | | 0.13 | 0.3 | 0.5 |
| 24/12/2018 15:10:14 | 37.704 | 15.015 | 3.23 | 2.2 | | 0.15 | 0.5 | 0.3 |
| 24/12/2018 15:14:04 | 37.715 | 15.025 | 2.57 | 2.1 | | 0.21 | 0.1 | 0.2 |
| 24/12/2018 15:16:30 | 37.706 | 15.017 | 2.71 | 1.9 | | 0.20 | 0.2 | 0.4 |
| 24/12/2018 15:21:37 | 37.714 | 15.069 | 4.16 | 1.8 | | 0.10 | 0.5 | 0.3 |
| 24/12/2018 15:29:45 | 37.718 | 15.040 | 1.92 | 1.8 | | 0.16 | 0.2 | 0.2 |
| 24/12/2018 15:33:14 | 37.711 | 15.023 | 1.39 | 2.1 | | 0.21 | 0.1 | 0.2 |
| 24/12/2018 15:34:13 | 37.691 | 14.963 | -1.55 | 1.8 | | 0.19 | 0.2 | 0.5 |
| 24/12/2018 15:38:01 | 37.716 | 15.074 | 2.88 | 2.1 | | 0.20 | 0.2 | 0.3 |
| 24/12/2018 15:40:46 | 37.689 | 14.934 | -0.77 | 2.0 | | 0.22 | 0.2 | 0.4 |
| 24/12/2018 15:43:12 | 37.703 | 15.054 | 0.35 | 3.2 | | 0.19 | 0.2 | 0.2 |
| 24/12/2018 15:49:11 | 37.698 | 15.031 | -1.57 | 1.9 | | 0.14 | 0.3 | 0.7 |
| 24/12/2018 15:52:07 | 37.700 | 15.015 | 3.37 | 2.2 | | 0.18 | 0.3 | 0.3 |
| 24/12/2018 15:53:26 | 37.706 | 15.023 | 2.91 | 1.9 | | 0.19 | 0.2 | 0.2 |
| 24/12/2018 15:55:53 | 37.720 | 15.026 | 1.66 | 1.8 | | 0.15 | 0.2 | 0.2 |
| 24/12/2018 15:57:43 | 37.719 | 15.041 | 0.72 | 1.6 | | 0.22 | 0.3 | 0.6 |
| 24/12/2018 16:00:21 | 37.719 | 15.028 | 2.54 | 1.9 | | 0.16 | 0.2 | 0.4 |
| 24/12/2018 16:01:41 | 37.716 | 15.037 | 1.78 | 2.0 | | 0.17 | 0.1 | 0.2 |
| 24/12/2018 16:03:47 | 37.711 | 15.038 | 2.89 | 2.1 | | 0.15 | 0.3 | 0.3 |
| 24/12/2018 16:06:46 | 37.692 | 14.960 | -1.56 | 2.1 | | 0.24 | 0.2 | 0.5 |
| 24/12/2018 16:08:17 | 37.712 | 15.029 | 1.33 | 2.1 | | 0.21 | 0.1 | 0.2 |
| 24/12/2018 16:09:26 | 37.717 | 15.024 | 2.29 | 2.0 | | 0.18 | 0.2 | 0.4 |
| 24/12/2018 16:12:00 | 37.722 | 15.033 | 0.74 | 1.7 | | 0.18 | 0.2 | 1.4 |
| 24/12/2018 16:15:10 | 37.719 | 15.037 | 1.90 | 1.9 | | 0.17 | 0.3 | 0.5 |
| 24/12/2018 16:15:45 | 37.715 | 15.018 | 3.60 | 1.9 | | 0.03 | 0.3 | 0.4 |
| 24/12/2018 16:16:37 | 37.719 | 15.022 | 1.71 | 1.7 | | 0.26 | 0.3 | 0.3 |
| 24/12/2018 16:20:09 | 37.712 | 15.030 | 2.61 | 1.9 | | 0.24 | 0.2 | 0.3 |
| 24/12/2018 16:25:42 | 37.709 | 15.034 | 1.34 | 1.9 | | 0.04 | 0.2 | 0.4 |
| 24/12/2018 16:30:30 | 37.716 | 15.036 | 1.49 | 1.8 | | 0.16 | 0.2 | 0.3 |
| 24/12/2018 16:47:38 | 37.708 | 15.035 | 2.44 | 1.9 | | 0.13 | 0.3 | 0.4 |
| 24/12/2018 16:50:10 | 37.710 | 15.045 | 0.86 | 4.3 | | 0.14 | 0.2 | 0.2 |
| 24/12/2018 16:54:40 | 37.711 | 15.042 | 1.33 | 2.2 | | 0.17 | 0.2 | 0.3 |
| 24/12/2018 17:08:58 | 37.709 | 15.021 | 0.65 | 2.2 | | 0.16 | 0.2 | 0.2 |
| 24/12/2018 17:18:49 | 37.714 | 15.005 | 2.54 | 1.9 | | 0.14 | 0.2 | 0.2 |
| 24/12/2018 17:23:19 | 37.711 | 15.015 | 1.95 | 2.7 | | 0.13 | 0.2 | 0.2 |
| 24/12/2018 17:41:25 | 37.709 | 15.020 | 0.48 | 2.6 | | 0.17 | 0.1 | 0.3 |
| 24/12/2018 17:51:44 | 37.720 | 15.028 | 0.90 | 1.9 | | 0.13 | 0.2 | 0.3 |
| 24/12/2018 17:59:49 | 37.714 | 15.019 | 0.89 | 2.5 | | 0.21 | 0.1 | 0.3 |
| 24/12/2018 18:03:39 | 37.705 | 15.025 | 2.32 | 2.2 | | 0.18 | 0.2 | 0.1 |
| 24/12/2018 18:04:24 | 37.706 | 15.024 | 2.03 | 2.1 | | 0.14 | 0.2 | 0.2 |
| 24/12/2018 18:08:59 | 37.717 | 15.017 | 1.67 | 2.6 | | 0.20 | 0.1 | 0.2 |
| 24/12/2018 18:16:20 | 37.714 | 15.024 | 0.47 | 2.8 | | 0.20 | 0.1 | 0.3 |
| 24/12/2018 18:26:19 | 37.708 | 15.042 | 0.44 | 3.2 | | 0.15 | 0.3 | 0.6 |
| 24/12/2018 18:30:13 | 37.715 | 15.067 | 3.94 | 2.3 | | 0.14 | 0.3 | 0.3 |
| 24/12/2018 18:43:32 | 37.690 | 14.979 | -0.06 | 3.1 | | 0.18 | 0.2 | 0.2 |
| 24/12/2018 19:00:02 | 37.710 | 15.016 | 0.72 | 3.1 | | 0.15 | 0.1 | 0.1 |
| 24/12/2018 19:23:54 | 37.722 | 15.018 | 2.94 | 2.6 | | 0.17 | 0.2 | 0.3 |
| 24/12/2018 19:26:19 | 37.687 | 14.957 | 1.52 | 4.0 | | 0.22 | 0.2 | 0.1 |
| 24/12/2018 19:45:45 | 37.700 | 15.017 | 1.01 | 3.0 | | 0.14 | 0.2 | 0.2 |
| 24/12/2018 19:54:49 | 37.706 | 15.018 | 1.80 | 2.1 | | 0.11 | 0.3 | 0.2 |
| 24/12/2018 19:59:29 | 37.711 | 15.018 | 0.50 | 3.1 | | 0.17 | 0.1 | 0.2 |
| 24/12/2018 20:44:35 | 37.707 | 15.022 | 1.15 | 2.2 | | 0.12 | 0.2 | 0.2 |
| 24/12/2018 20:44:58 | 37.704 | 15.024 | 1.13 | 2.0 | | 0.17 | 0.2 | 0.2 |
| 24/12/2018 20:51:27 | 37.697 | 15.085 | 4.72 | 3.0 | | 0.15 | 0.2 | 0.5 |
| 24/12/2018 20:54:51 | 37.713 | 15.031 | 1.09 | 1.8 | | 0.12 | 0.3 | 0.4 |
| 24/12/2018 21:04:30 | 37.697 | 15.056 | -0.63 | 2.5 | | 0.19 | 0.2 | 0.2 |
| 24/12/2018 21:05:10 | 37.699 | 15.023 | 2.49 | 2.0 | | 0.16 | 0.3 | 0.3 |
| 24/12/2018 21:12:21 | 37.709 | 15.021 | 1.03 | 2.4 | | 0.15 | 0.2 | 0.2 |
| 24/12/2018 21:17:34 | 37.705 | 15.021 | 2.57 | 2.7 | | 0.18 | 0.2 | 0.3 |
| 24/12/2018 21:22:55 | 37.709 | 15.019 | 0.51 | 2.9 | | 0.19 | 0.1 | 0.3 |
| 24/12/2018 21:41:22 | 37.699 | 15.023 | 1.18 | 2.4 | | 0.16 | 0.2 | 0.2 |
| 24/12/2018 21:47:52 | 37.712 | 15.032 | 1.57 | 1.6 | | 0.12 | 0.3 | 0.3 |
| 24/12/2018 22:37:24 | 37.704 | 15.009 | 0.10 | 3.0 | | 0.16 | 0.1 | 0.2 |
| 24/12/2018 23:09:06 | 37.705 | 15.025 | 2.25 | 1.8 | | 0.25 | 0.3 | 0.2 |
| 24/12/2018 23:22:59 | 37.699 | 15.027 | 1.55 | 2.3 | | 0.20 | 0.2 | 0.2 |
| 24/12/2018 23:24:45 | 37.706 | 15.022 | 0.49 | 2.4 | | 0.20 | 0.2 | 0.3 |
| 24/12/2018 23:31:52 | 37.698 | 15.026 | 2.08 | 1.9 | | 0.26 | 0.2 | 0.1 |
| 24/12/2018 23:33:41 | 37.686 | 14.966 | 1.42 | 2.4 | | 0.25 | 0.3 | 0.2 |
| 24/12/2018 23:46:09 | 37.717 | 15.018 | -1.42 | 2.1 | | 0.20 | 0.3 | 0.9 |
| 24/12/2018 23:46:24 | 37.698 | 15.017 | 2.09 | 2.2 | | 0.14 | 0.4 | 0.3 |
| 24/12/2018 23:48:29 | 37.702 | 15.023 | 1.48 | 1.9 | | 0.18 | 0.3 | 0.2 |
| 25/12/2018 00:18:34 | 37.708 | 15.034 | 1.96 | 2.1 | | 0.22 | 0.2 | 0.2 |
| 25/12/2018 00:29:07 | 37.709 | 15.020 | 1.12 | 2.2 | | 0.14 | 0.2 | 0.2 |
| 25/12/2018 00:35:07 | 37.753 | 15.090 | 3.18 | 2.2 | | 0.16 | 0.3 | 0.4 |
| 25/12/2018 01:04:29 | 37.718 | 15.041 | 3.27 | 2.2 | | 0.19 | 0.2 | 0.3 |
| 25/12/2018 01:16:45 | 37.706 | 15.051 | -0.48 | 2.1 | | 0.26 | 0.2 | 0.3 |
| 25/12/2018 01:30:04 | 37.699 | 15.025 | 1.67 | 2.2 | | 0.19 | 0.2 | 0.1 |
| 25/12/2018 01:33:10 | 37.713 | 15.011 | 0.88 | 2.3 | | 0.15 | 0.7 | 0.8 |
| 25/12/2018 01:46:19 | 37.710 | 15.019 | 0.78 | 1.9 | | 0.18 | 0.6 | 0.6 |
| 25/12/2018 01:51:03 | 37.710 | 15.023 | 1.98 | 2.2 | | 0.21 | 0.2 | 0.2 |
| 25/12/2018 02:07:00 | 37.703 | 15.046 | -1.60 | 2.1 | | 0.18 | 0.2 | 0.2 |
| 25/12/2018 02:19:59 | 37.699 | 15.023 | 1.13 | 2.0 | | 0.23 | 0.2 | 0.2 |
| 25/12/2018 02:26:50 | 37.713 | 15.027 | 1.82 | 2.0 | | 0.23 | 0.2 | 0.1 |
| 25/12/2018 03:37:24 | 37.725 | 15.100 | 4.96 | 2.0 | | 0.19 | 0.2 | 0.5 |
| 25/12/2018 03:41:52 | 37.717 | 15.069 | 3.85 | 2.0 | | 0.20 | 0.2 | 0.2 |
| 25/12/2018 04:03:53 | 37.708 | 15.027 | 0.54 | 2.9 | | 0.17 | 0.1 | 0.2 |
| 25/12/2018 04:08:36 | 37.689 | 14.964 | 2.48 | 2.7 | | 0.21 | 0.2 | 0.2 |
| 25/12/2018 04:19:39 | 37.697 | 15.025 | 1.49 | 2.1 | | 0.22 | 0.2 | 0.2 |
| 25/12/2018 04:33:32 | 37.720 | 15.047 | 2.45 | 2.3 | | 0.18 | 0.2 | 0.5 |
| 25/12/2018 05:47:58 | 37.695 | 15.082 | 0.92 | 2.0 | | 0.28 | 0.2 | 0.2 |
| 25/12/2018 05:51:47 | 37.698 | 15.056 | -1.57 | 2.6 | | 0.22 | 0.2 | 0.4 |
| 25/12/2018 06:27:53 | 37.705 | 15.028 | 1.62 | 2.7 | | 0.19 | 0.1 | 0.1 |
| 25/12/2018 06:44:02 | 37.715 | 15.063 | 3.91 | 2.0 | | 0.17 | 0.3 | 0.3 |
| 25/12/2018 07:03:13 | 37.635 | 14.951 | 2.87 | 2.9 | | 0.24 | 0.2 | 0.3 |
| 25/12/2018 07:10:20 | 37.683 | 14.966 | 3.47 | 2.2 | | 0.17 | 0.3 | 0.3 |
| 25/12/2018 07:11:25 | 37.706 | 15.027 | 1.39 | 2.1 | | 0.16 | 0.2 | 0.2 |
| 25/12/2018 07:17:25 | 37.702 | 15.038 | -0.93 | 2.4 | | 0.25 | 0.1 | 0.3 |
| 25/12/2018 07:24:38 | 37.690 | 15.074 | 1.02 | 2.3 | | 0.20 | 0.2 | 0.3 |
| 25/12/2018 07:31:32 | 37.710 | 15.014 | 3.97 | 2.2 | | 0.20 | 0.2 | 0.2 |
| 25/12/2018 07:32:52 | 37.699 | 15.037 | -1.14 | 2.7 | | 0.23 | 0.1 | 0.3 |
| 25/12/2018 08:00:31 | 37.651 | 14.942 | 8.57 | 1.9 | | 0.10 | 0.5 | 0.8 |
| 25/12/2018 08:00:58 | 37.709 | 15.020 | 1.28 | 2.1 | | 0.12 | 0.2 | 0.2 |
| 25/12/2018 08:24:40 | 37.703 | 15.020 | 1.10 | 2.2 | | 0.14 | 0.2 | 0.2 |
| 25/12/2018 08:50:21 | 37.696 | 15.026 | 1.97 | 2.0 | | 0.15 | 0.2 | 0.2 |
| 25/12/2018 09:27:18 | 37.701 | 15.032 | -0.86 | 2.2 | | 0.19 | 0.1 | 0.3 |
| 25/12/2018 12:37:58 | 37.754 | 15.085 | 5.74 | 2.0 | | 0.18 | 0.4 | 0.5 |
| 25/12/2018 12:43:48 | 37.717 | 15.047 | 1.58 | 2.3 | | 0.18 | 0.1 | 0.1 |
| 25/12/2018 12:45:43 | 37.661 | 14.887 | -1.59 | 3.5 | | 0.26 | 0.2 | 0.4 |
| 25/12/2018 13:00:54 | 37.639 | 14.944 | 1.97 | 2.4 | | 0.16 | 0.3 | 0.9 |
| 25/12/2018 13:01:07 | 37.723 | 15.014 | 1.60 | 1.9 | | 0.18 | 0.2 | 0.6 |
| 25/12/2018 16:31:06 | 37.712 | 15.025 | 0.71 | 2.8 | | 0.16 | 0.1 | 0.2 |
